# Supplementary material
Source: PubMed Central journal article supplement (PMC6351742)
Supplement: 1ee3ae2b45eff49f14ad07cbd457c0da_JB.00681-18-s0001.pdf [file 1ee3ae2b45eff49f14ad07cbd457c0da_JB.00681-18-s0001.pdf]

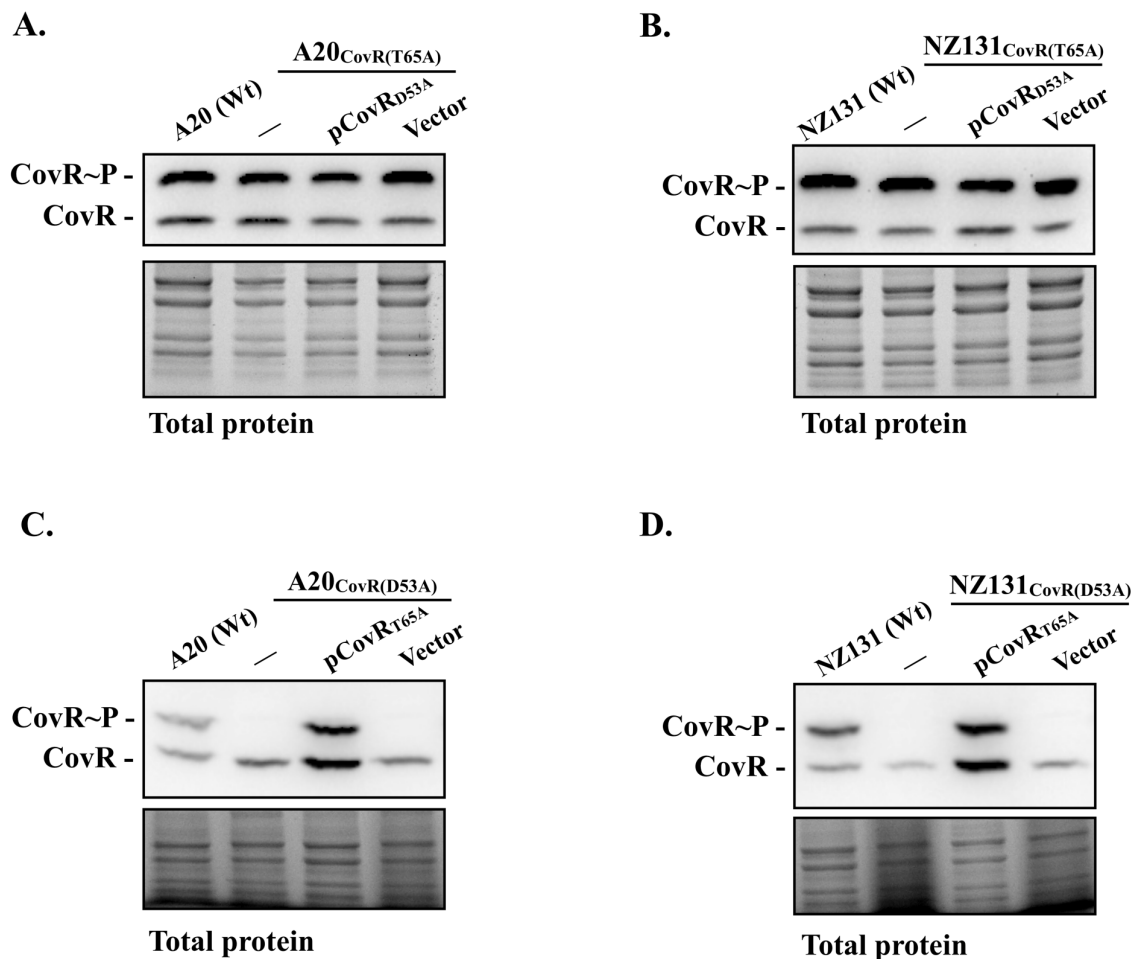

**Supplementary Figure 1. The levels of phosphorylated CovR protein in the wild-type strains, *covR* mutants, vector-control, and *covR trans*-complementary strains.** Bacterial strains were cultured to the exponential phase of growth and total proteins were collected for Phostag western blot analysis. (A) and (B) The levels of phosphorylated CovR in the wild-type strains (A20 and NZ131), CovR<sub>T65A</sub> mutants, their vector-control strains (Vector), and CovR<sub>D53A</sub> *trans*-complementary strains (pCovR<sub>D53A</sub>). (C) and (D) The levels of phosphorylated CovR in the wild-type strains (A20 and NZ131), CovR<sub>D53A</sub> mutants, their vector-control strains (Vector), and CovR<sub>T65A</sub> *trans*-complementary strains (pCovR<sub>T65A</sub>). CovR~P: phosphorylated CovR; CovR: nonphosphorylated CovR. Total protein serves as the loading control.
